# Supplementary material for: Crocetin Mitigates Irradiation Injury in an In Vitro Model of the Pubertal Testis: Focus on Biological Effects and Molecular Mechanisms
Source: MDPI journal article supplement (doi:10.3390/molecules26061676), 2021-03-17
Supplement: s1 [file s1]

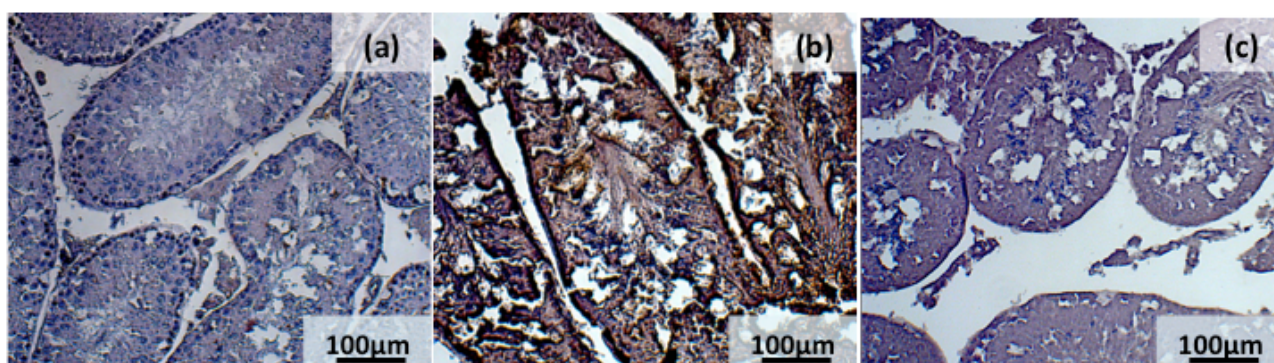

**Supplementary Figure 1.** Representative images showing immunolocalization of 4-HNE in control (a), irradiated (b) and crocetin + irradiated group (c).
